# Supplementary material
Source: MDPI journal article supplement (https://www.mdpi.com/2072-4292/10/5/659)

## Supplementary Materials

Figure S1: Box plots showing LiDAR measurement ratios for cross-survey (AM) comparison of eight LiDAR statistics characterising the canopy structure of individual trees, relative to the distance between matched trees in a nearest neighbourhood analysis (see methods for detail). Each box shows the median (horizontal line), quartiles (upper and lower extent of box), and range (dashed vertical lines) for each binned distance interval. Results are for a 20 ha plot of mixed *Quercus suber*/*Q. canariensis* forest in the Los Alcornocales National Park of southern Spain.

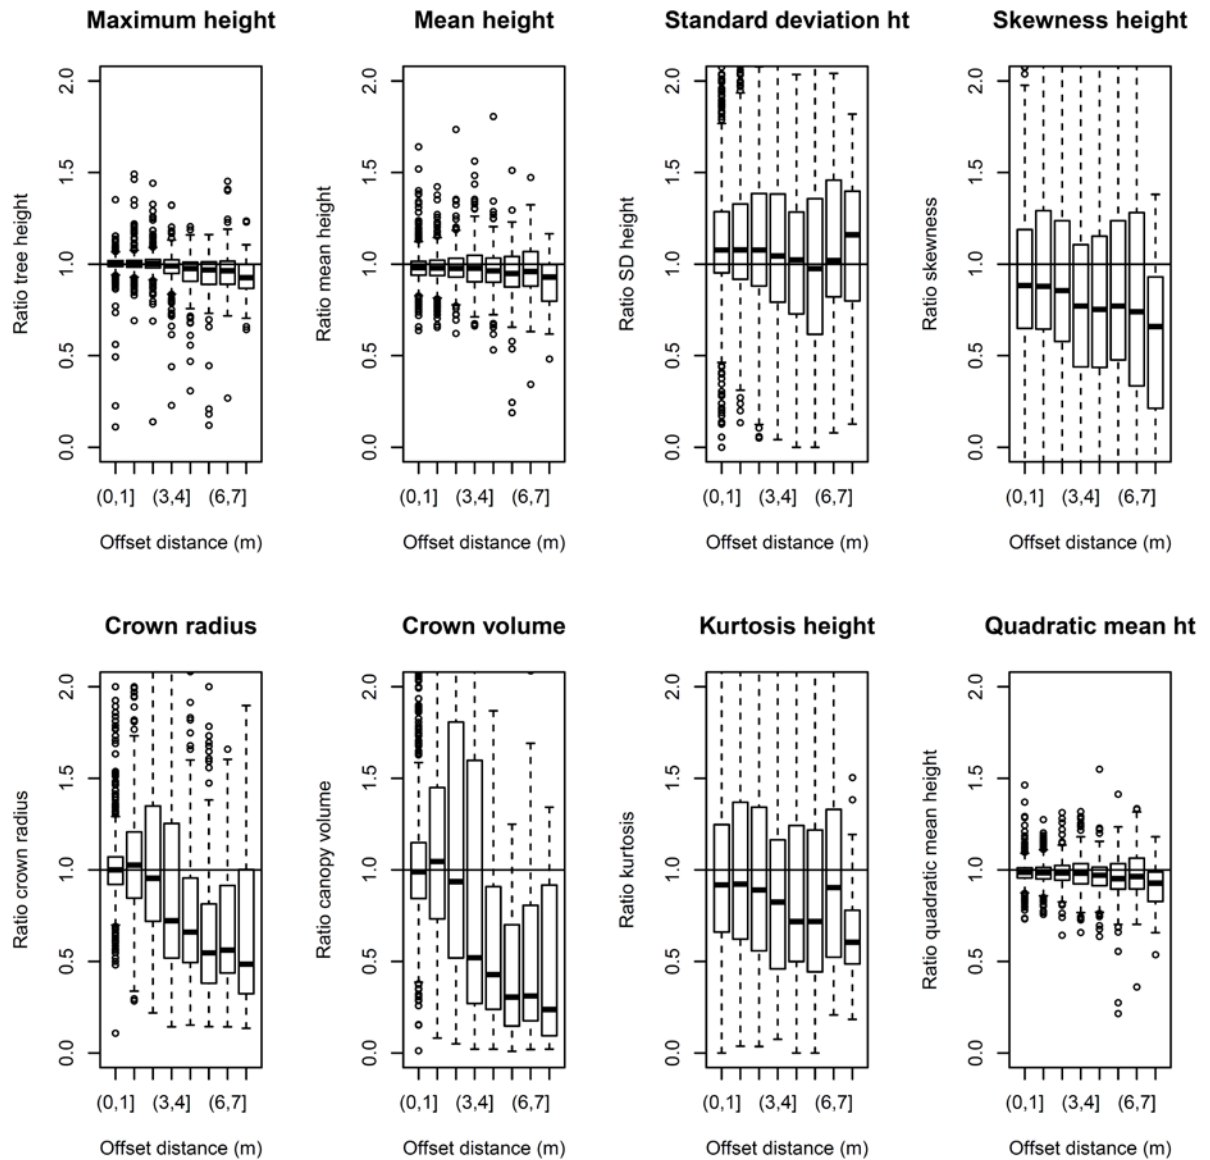

Supplement: s1 [file s1]
